# Supplementary material
Source: Springer Nature journal article supplement (https://www.springermedizin.de/resource/supplementary/13075_2004_1584_MOESM5_ESM.pdf/9690110)

Percent GI discontinuations with celecoxib

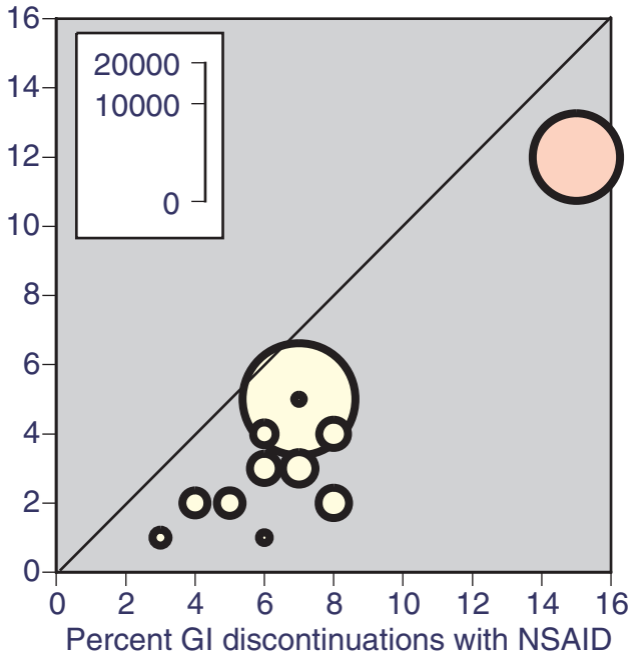

Supplement: MOESM5 [file 9690110]
